# Supplementary material
Source: PubMed Central journal article supplement (PMC4959179)
Supplement: AEM.00319-16_zam999117191so1.pdf [file AEM.00319-16_zam999117191so1.pdf]

**Table S1. The result of a BLAST search using the uncharacterized domain of Tc-ChiD**

GenomeNet BLAST search (<http://www.genome.jp/tools/blast/>)  
 Query: Tc-ChiD (321-805)  
 Protein library:KEGG genes

|    | Entry             | Description                                      | Bits | E-value   |
|----|-------------------|--------------------------------------------------|------|-----------|
| 1  | cbi:CLJ_B3058     | hypothetical protein                             | 366  | 7.00E-116 |
| 2  | cby:CLM_3195      | hypothetical protein                             | 366  | 8.00E-116 |
| 3  | cbj:H04402_02911  | chitinase Jessie 3                               | 363  | 6.00E-115 |
| 4  | cbm:CBF_2873      | hypothetical protein                             | 362  | 2.00E-114 |
| 5  | cbf:CLI_2881      | hypothetical protein                             | 362  | 2.00E-114 |
| 6  | cbb:CLD_1743      | hypothetical protein                             | 359  | 3.00E-113 |
| 7  | cbh:CLC_2708      | hypothetical protein                             | 358  | 4.00E-113 |
| 8  | cba:CLB_2775      | hypothetical protein                             | 358  | 4.00E-113 |
| 9  | cbo:CBO2831       | hypothetical protein                             | 358  | 4.00E-113 |
| 10 | clid:CLSPO_c29070 | chitinase A-like protein                         | 358  | 1.00E-112 |
| 11 | cbl:CLK_2219      | hypothetical protein                             | 355  | 9.00E-112 |
| 12 | cbk:CLL_A1377     | putative secreted chitodextrinase                | 335  | 7.00E-104 |
| 13 | ehi:EHI_152170    | 2.t00133; chitinase Jessie 3                     | 96.3 | 3.00E-18  |
| 14 | edi:EDI_038370    | chitin binding lectin                            | 95.9 | 4.00E-18  |
| 15 | eiv:EIN_066080    | chitin binding lectin, putative                  | 89.7 | 3.00E-16  |
| 16 | eiv:EIN_095550    | chitin binding lectin, putative                  | 87.8 | 1.00E-15  |
| 17 | edi:EDI_333670    | chitin binding lectin                            | 67.4 | 6.00E-10  |
| 18 | ehi:EHI_015750    | chitinase Jessie3                                | 67   | 7.00E-10  |
| 19 | aci:ACIAD0436     | ahpC; alkyl hydroperoxide reductase, C22 subunit | 37.7 | 3.2       |
| 20 | oar:OA238_c13710  | hypothetical protein                             | 38.9 | 3.4       |
| 21 | fve:101306474     | protein transport protein SEC16B homolog         | 38.5 | 4.5       |
| 22 | ccs:CCNA_00607    | TonB-dependent receptor                          | 37.7 | 8.2       |
| 23 | ccr:CC_0571       | TonB-dependent receptor                          | 37.7 | 8.2       |
| 24 | pri:PRIO_3348     | putative membrane protein                        | 37.7 | 8.4       |
| 25 | hab:SG26_01490    | hypothetical protein                             | 37   | 8.6       |

\*Group of proteins showing high similarities to each other are shown in colored backgrounds

Horiuchi et al., Fig. S1

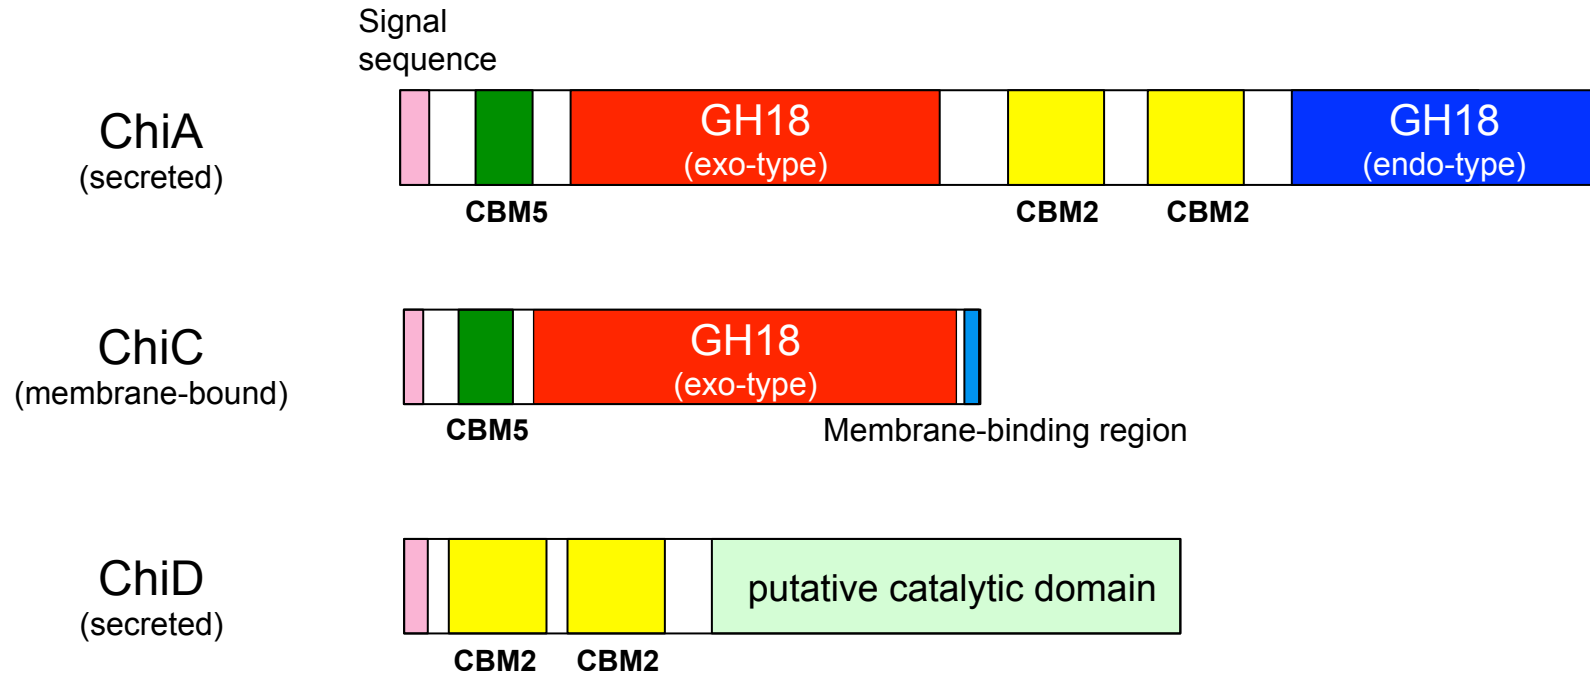

**Figure S1. Schematic description of putative chitinases identified on the genome of *T. chitonophagus*.**

Horiuchi et al., Fig. S2

>TcChiA

MNTKSKIAALLVVLVAIGVVPPLVTVPLVSAETQIQLSAYPIAWDIVNLTWTPVSNVSGYEIYRST SPE  
GIISPQNLIVYVNWSSYPQYEPGKTY YQGDIVEYNGKIYRAKYWTTSQPSDDPYGAWELLGEAEPTTNY  
LDQYGLQPETTYYYVVPVFKDGSKGTPSNVVEVTPPKKFRVVVYIISWGIYARKFY PEDIPFDKVTH  
VLYAFLKPEQDGSVVMYDTWADPQNLEKFKELKKKYPQVKILISVGGWTL SKYFSVIAADPAKRQ RFAE  
TALEIIRKYDLGDVIDWEYPGGGMEGNYVSPDDGKNFVLLLKTVREVL DQAEKEDKKHYLLTAAVPA  
DPVKAARINWTEAMKYLDFINVMTYDYHGAWENITGHNAPLYADPNAPYTDPNVKWNFN VNASIQWYLH  
HGVAPEKISLGLPFYGRSFANVPPENGLYQPFQGTDPDGTWGPASETYGVM DYWDIEEKKASGQYNYW  
DPVAMVPWLYSPSLKIFISYDDQKSIGIKVDYALKYKLGGMVWEITADRKPGTNNHPLLDTI IQHIEQ  
GGGVPTPAPQPSPTPTQTTTTTTTTTSVPTTTTTTTTTTTTTTSVPTTTTTTTTTTTTTTATPAPT TTTTTTTTTT  
SAPTQTTTTTTTTTSPTATSTSTQTTTTTSSAGSPVKPGSMSVKVNDWGTGGQFDITLNLGAQYDWVVKV  
QLDSSTQMGN YWGVQKSQEGDWVVF TPLSWNKGPTASFGFIVNGPVSGVKQIILEINGEVWDVWPEVSQ  
VPSETGTTTTVTTTTTTTTTTTTTSVPTTSTTTVTTTTTTTTTTTTTTTVTSTTTASTTTSTVTTTTTSSAGSPVKP  
GSM SVKVNDWGTGGQFDITLNLGGQYDWVVKVQLDSSTQMGN YWGVQKSQEGDWVVF TPLSWNKGPTAS  
FGFIVNGPVSGVKQIILEINGE IWDVWPSSGEATTTTSTTTTTTTTTTTTTTTATPAPT TTTTTTTTTTSTPT  
QTTTTTTTTQTEVPAPVGANPIPEHFFAPYIDMTLSVHKPLTEYAQLTGTKYFTLAFI IYSSAYGPSWGG  
ALPLDTFVQEVN DLRKMGGEV IIAFGGAVGPYLCQQAQSAEQLAQWYIQIIDMYNATYLD FDI ESYVDA  
NMLADALLIVQRERPWKISFTLPSDPGVGLT GSGYSLIKTMVEKGVKIDRVNAMTMDY YWTPSNAENA  
IKVAQNLFNQLKQLYPNKTDEEIWGMIGLTPMIGVNDDKSVFTLQDAQTLVDWAIQYKIRALAFWSVDR  
DHPGPEGQV SPLHRGTSDPDWAYSHVFVKFMEAFGYQPVTQQAVSST

**Figure S2. Amino acid sequence of *Tc*-ChiA.**

Horiuchi et al., Fig. S3

>TcChiC

MRFIGVTCMKRALALTLVVIVILFATPTPVLSKSEIKLKAQPIAWDAVNLTWTPLSNVKAYEVYRSTNP  
RDVYSSPNLIFVVNWSNYTKYKENWNYLPGEIVEYQGYLWKAKKVTSQPPQEGDYWEKLGPIPTNTAV  
DYFNVGTNTTYYYIVVPVFKDGKDGKRGTPSNVIKVTTPPQPYRIVVYYISWGIYARAFSPYDVPFENV  
THVNYAFLKLENGTVTWADPWADPMNLEAFKELKSRYPAVKFLISVGGWTLISKYFSPVAADPKKRQEF  
IKSAIAIIRKYNLDGIDIDWEYPGGGGMEGNYVSPDDPRNFIVLLKEFRKALDDVGREDHKHYLLTVAA  
PANLEIASRIDWKEASKYLDFINVMTYDYIGPWSPVTGHNAPLYRNPNGPDYGSVDQTIKWYIEHVPDR  
TKIVLGIPFYARSFANVPPKNHGLFQPYKGTAGTWGSAAETHGIMDYWDVADKAKTGEYEYFWDNYSK  
VPWLYSESKRIFITFDDPRSILIKTQYMLNQSLGGVMIWEITADRKPGTSSHPLLAHVLEGLQEKPPVW  
IPDKYVLGSNVPSNITIPKPETVPTKRGGVCGPAAILIVALFVLLKRNS

**Figure S3. Amino acid sequence of *Tc-ChiC*.**

Horiuchi et al., Fig. S4

>TcChiD

MGLKRLLVLVVAVVVLSSGINFSWALGNRPSEGTGVAGKLSFKATFWNTGGQYTVDMKLDSPAEWKVYV  
KIENGELGNYWNTGQVYREKDYYVFPAASWNKGPMAFSGFIVTGSEAVVSEILLVVGSEIVDRWSMENT  
STSTTTYTTTSQTPTQTPTTQTPTTTTSTPVTSTTTSAPPSLVKPGSMSVKVTSWTGASQYDVTLN  
LGEALDWMVKVKLSPGARLGSYWSVNRAEEDGWIIFTPLTWNKGPTASFGFIVQNGEAESIALIVNNQI  
WDIWPENAPVPSVPSPAPEQSPVSQPSQGLVNIITDPNDPDELYAAYRIVSETGDKITVELTLANKNTHY  
VWNGWCFDIKNITFETTGVLSIKYADGGEPVYNVNGNLVTIDLTRGIFHLNNTVKIIIEIQKSGDNP  
YPHNFKIHYLRGESIIYPTIGELPASWKPGNFTLSDLIADPKSYYPHVKPHQNGFIMYNPPHPTQIIII  
GLADIDYPLNLASSARMWVPNKYFAMGLALAYEWFKVNPNFLMALAAKENWGTAVTKDPAFKGYKVIID  
EEYYWPVQIDHPDGIFQVESGNFNQIKAYYPDIFPDTADHDDYMKVSLDPNDTAWITSPIVAAVSLTM  
ERELLYAAVGDKYNEFLRLAKDPWAETEIIDFGYNRGVGAIEALKIFSDNWEKAINAEVLWKEFNMEGF  
GGHVPTVINITATMDMETERIYDANLTWDDIEYFFTVVRQKFFRPGAISDEEWNAMMRDVKRAYDLLSQ  
HWGGDHISYRYDFLTILRVAMKHWPEPHIPRPTGDDWYYHARNYNP

**Figure S4. Amino acid sequence of *Tc-ChiD*.**

Horiuchi et al., Fig. S5

```

Tc-ChiD_1    -GTGVAGKLSFKATFWNTGGQYTVDMKLDSPAEWKVYVKIENG-ELGNYWNTGQVYREKD
Tc-ChiD_2    PSLVKPGSMSVKVTSWTGASQYDVTNLNLGEALDWMVKVLSPGARLGSYWSVNRAE-EDG
Pf-ChiB      TPVPVSGSLEVKVNDWGSGAEYDVTNLNLGDQYDWTVKVKLAPGATVGSFWSANKQE-GNG
Tk-ChiA_2    GDFVKPGSLSVKVTDWGN-TEYDVTNLNLGGTYDWVVKVCLKDGSSVSSFWSANKAE-EGG
Tk-ChiA_3    GDLVKPDAFSVKIQDWGS-TEYDVTNLNLGGTYDWVVKVCLKDGSAVSSVWSANKAE-EGG
              .. :..*   *       :* *  ::* .   :* * ** :   *   :.. *...:   .

Tc-ChiD_1    YYVFPAASWNKGPMASFGFIVTG-SEAVVSEILLVVGSEIVDRW
Tc-ChiD_2    WIIFTPLTWNKGPTASFGFIVQN---GEAESIALIVNNQIWDIW
Pf-ChiB      YVIFTTPVSWNKGPTATFGFIVNGPQDKVEEITLEINGQVIDIW
Tk-ChiA_2    YVVFTPVSWNRGPTATFGFIATG--SESVEAIYLYVDGQLWDAW
Tk-ChiA_3    YVVFTPVSWNKGPTATFGFIATG--SEPVEAMYLYVNDQLWDVW
              :  :*..  :**:** *:*:**. .           .. : * :...: * *

```

**Figure S5. Alignment of ChBD amino acid sequences from hyperthermophilic archaea.** The sequences of ChBD1 and ChBD2 of *Tc*-ChiD (residues 33-133 and 181-280), ChBD of *Pf*-ChiB (residues 259-361) and ChBD2 and ChBD3 of *Tk*-ChiA (residues 621-720 and 764-863) are shown aligned by the Clustal W program. The conserved Trp residues corresponding to Trp<sup>274</sup>, Trp<sup>308</sup> and Trp<sup>326</sup> of *Pf*-ChiB are indicated in red.
